# Supplementary material
Source: MDPI journal article supplement (https://www.mdpi.com/2076-3298/4/4/68)
Supplement: s1 [file s1]

## Supplementary 1

### SIAPA index's and indicator's ratings by protected area managers and scientists

|                                                         | Protected area managers                       |                                            |                                             |                                             |                                              |                                                      |                                            |                                               |                                                 |                                                        |                                                       |                               |                                 |
|---------------------------------------------------------|-----------------------------------------------|--------------------------------------------|---------------------------------------------|---------------------------------------------|----------------------------------------------|------------------------------------------------------|--------------------------------------------|-----------------------------------------------|-------------------------------------------------|--------------------------------------------------------|-------------------------------------------------------|-------------------------------|---------------------------------|
| SIAPA Indices & Indicators                              | Regional Ministry of Environment of Cantabria | Regional Ministry of Environment of Aragon | Regional Ministry of Environment of Galicia | Regional Ministry of Environment of Navarra | Regional Ministry of Environment of Cataluña | Regional Ministry of Environment of Balearic Islands | Regional Ministry of Environment of Murcia | Regional Ministry of Environment of Andalusia | Regional Ministry of Environment of Extremadura | Regional Ministry of Environment of Castilla-La Mancha | Regional Ministry of Environment of Castilla and Leon | National Park Autonomous Body | Spanish Ministry of Environment |
| STATE OF CONSERVATION                                   | 5                                             | 5                                          | 5                                           | 5                                           | 5                                            | 5                                                    |                                            | 4                                             | 5                                               |                                                        | 5                                                     | 5                             | 5                               |
| Population trends of endangered species or sub-species  | 4                                             | 5                                          | 4                                           | 5                                           | 5                                            | 5                                                    | 5                                          | 5                                             | 5                                               | 5                                                      | 5                                                     |                               | 3                               |
| Changes in the extent of focal habitats                 |                                               |                                            |                                             |                                             |                                              |                                                      |                                            |                                               |                                                 |                                                        |                                                       |                               |                                 |
| Changes in the features for which the PA was designated | 4                                             | 5                                          | 5                                           | 5                                           | 5                                            | 4                                                    | 2                                          | 4                                             | 5                                               | 3                                                      | 4                                                     |                               | 5                               |
| Visual impact                                           |                                               | 4                                          | 4                                           | 3                                           | 5                                            | 4                                                    | 3                                          | 4                                             | 4                                               | 4                                                      | 3                                                     |                               | 4                               |
| Surface water quality                                   | 3                                             | 3                                          | 4                                           | 4                                           | 4                                            | 5                                                    | 5                                          | 4                                             | 4                                               | 4                                                      | 4                                                     |                               | 5                               |
| Health of vegetation                                    | 3                                             | 4                                          | 4                                           | 4                                           | 2                                            | 2                                                    | 2                                          | 4                                             | 4                                               | 4                                                      | 4                                                     |                               | 5                               |
| PLANNING                                                | 5                                             | 2                                          | 4                                           | 5                                           | 5                                            | 4                                                    |                                            | 4                                             | 4                                               |                                                        | 5                                                     | 3                             | 3                               |
| Appropriateness of protection regulation                | 5                                             | 5                                          | 5                                           | 5                                           | 5                                            | 5                                                    |                                            | 5                                             | 4                                               | 5                                                      | 5                                                     |                               | 4                               |
| Existence of updated management plan                    | 5                                             | 5                                          | 4                                           | 5                                           | 5                                            |                                                      | 5                                          | 5                                             | 4                                               | 3                                                      | 4                                                     |                               | 4                               |
| Existence of updated socioeconomic plan                 | 4                                             | 2                                          | 1                                           | 3                                           | 5                                            | 3                                                    | 5                                          | 4                                             | 4                                               | 2                                                      | 3                                                     |                               | 4                               |

Fine-tuning of a protected area effectiveness evaluation tool: implementation on two emblematic Spanish National Parks

|                                                                  |   |   |   |   |   |   |   |   |   |   |   |   |   |
|------------------------------------------------------------------|---|---|---|---|---|---|---|---|---|---|---|---|---|
| <b>MANAGEMENT</b>                                                | 4 | 2 | 4 | 5 | 5 | 4 |   | 5 | 5 |   | 5 | 3 | 5 |
| Degree of fulfilment of management objectives                    | 5 | 5 | 5 | 5 | 5 | 5 | 5 | 5 | 4 | 4 | 4 |   | 5 |
| Effectiveness of public participation bodies                     | 4 | 4 | 4 | 4 | 4 | 4 | 5 | 5 | 3 | 4 | 4 |   | 4 |
| Existence of sufficient management staff                         | 5 | 3 | 3 | 5 | 4 | 5 | 5 | 4 | 5 | 4 | 5 |   | 5 |
| Existence of environmental education and volunteering activities | 3 | 3 | 4 | 4 | 3 | 4 | 5 | 4 | 3 | 3 | 4 |   | 4 |
| <b>SOCIOECONOMIC CONTEXT</b>                                     | 2 | 1 | 1 | 4 | 5 | 3 |   | 4 | 3 |   | 3 | 2 | 4 |
| Local population density                                         | 4 | 4 | 4 | 3 | 3 | 4 |   | 3 | 3 | 3 | 3 |   | 3 |
| Land use changes                                                 | 4 | 5 | 3 | 4 | 4 | 5 | 4 | 3 | 5 | 4 | 2 |   | 5 |
| <b>SOCIAL PERCEPTION AND VALUATION</b>                           | 3 | 2 | 4 | 4 | 5 | 3 |   | 4 | 3 |   | 4 | 2 | 4 |
| Degree of knowledge on the PA                                    | 3 | 5 | 4 | 4 | 4 | 5 | 4 | 5 | 5 | 5 | 5 |   | 4 |
| Personal importance                                              | 3 | 4 | 4 | 4 |   | 3 | 4 | 4 | 4 | 4 | 5 |   | 3 |
| <b>THREATS TO CONSERVATION</b>                                   | 4 | 5 | 3 | 4 | 5 | 2 |   | 5 | 5 |   | 3 | 5 | 3 |
| Fragmentation                                                    | 3 | 5 | 4 | 4 | 4 | 4 | 4 | 4 | 5 | 4 | 5 |   | 5 |
| Density of alien invasive species                                | 4 | 4 | 5 | 4 | 4 | 3 | 5 | 5 | 3 | 5 | 5 |   | 5 |
| Density of visitors                                              | 3 | 4 | 5 | 3 | 2 | 5 | 4 | 4 | 3 | 2 | 2 |   | 3 |
| Activities performed by visitors                                 | 2 | 5 | 4 | 4 | 4 | 5 | 5 | 4 | 4 | 2 | 4 |   | 4 |
| Climate change                                                   | 4 | 3 | 3 | 3 | 4 | 3 |   | 3 | 4 | 5 | 2 |   | 2 |

|                                                                  | Scientists     |                                          |                                        |                                   |                        |                      |                       |
|------------------------------------------------------------------|----------------|------------------------------------------|----------------------------------------|-----------------------------------|------------------------|----------------------|-----------------------|
| SIAPA Indices & Indicators                                       | EUROPARC-Spain | IUCN-World Commission on Protected Areas | Spanish Observatory for Sustainability | Spanish National Research Council | University of Zaragoza | University of Malaga | University of Seville |
| STATE OF CONSERVATION                                            | 5              | 3                                        | 2                                      | 5                                 | 5                      | 5                    | 5                     |
| Population trends of endangered species or sub-species           | 4              | 5                                        | 5                                      | 5                                 | 5                      | 5                    | 5                     |
| Changes in the extent of focal habitats                          |                | 5                                        |                                        | 5                                 |                        | 5                    |                       |
| Changes in the features for which the PA was designated          |                | 5                                        | 3                                      | 5                                 | 5                      | 5                    | 5                     |
| Visual impact                                                    | 4              | 4                                        | 3                                      | 4                                 | 4                      | 5                    | 4                     |
| Surface water quality                                            | 3              | 5                                        | 4                                      | 4                                 | 4                      | 4                    | 4                     |
| Health of vegetation                                             | 4              | 3                                        | 5                                      | 4                                 | 5                      | 4                    | 4                     |
| PLANNING                                                         | 4              | 2                                        | 4                                      | 4                                 | 4                      | 5                    | 5                     |
| Appropriateness of protection regulation                         | 5              | 5                                        | 5                                      | 5                                 | 3                      | 5                    | 5                     |
| Existence of updated management plan                             | 4              |                                          | 5                                      | 5                                 | 4                      | 5                    | 4                     |
| Existence of updated socioeconomic plan                          |                |                                          | 4                                      | 4                                 | 3                      | 4                    | 4                     |
| MANAGEMENT                                                       | 5              | 3                                        | 5                                      | 4                                 | 5                      | 4                    | 3                     |
| Degree of fulfilment of management objectives                    | 5              | 4                                        | 5                                      | 5                                 | 5                      | 4                    | 5                     |
| Effectiveness of public participation bodies                     |                | 3                                        | 5                                      | 4                                 | 4                      | 4                    | 3                     |
| Existence of sufficient management staff                         |                | 4                                        | 5                                      | 4                                 | 4                      | 4                    | 3                     |
| Existence of environmental education and volunteering activities |                | 1                                        | 4                                      | 4                                 | 2                      | 3                    | 3                     |
| SOCIOECONOMIC CONTEXT                                            | 2              | 1                                        | 3                                      | 3                                 | 2                      | 5                    | 3                     |
| Local population density                                         |                | 4                                        | 3                                      | 4                                 | 1                      | 4                    | 3                     |
| Land use changes                                                 | 5              | 4                                        | 5                                      | 5                                 | 5                      | 5                    | 4                     |
| SOCIAL PERCEPTION AND VALUATION                                  | 2              | 1                                        | 4                                      | 2                                 | 3                      | 4                    | 3                     |
| Degree of knowledge on the PA                                    |                |                                          | 5                                      | 4                                 | 3                      | 5                    | 3                     |
| Personal importance                                              |                |                                          | 4                                      | 3                                 | 4                      | 5                    | 4                     |
| THREATS TO CONSERVATION                                          | 4              | 2                                        | 5                                      | 5                                 | 4                      | 5                    | 4                     |
| Fragmentation                                                    |                | 4                                        | 5                                      | 5                                 | 3                      | 5                    | 3                     |
| Density of alien invasive species                                |                | 4                                        | 4                                      | 5                                 | 3                      | 5                    | 4                     |
| Density of visitors                                              |                |                                          | 3                                      | 4                                 | 4                      | 4                    | 4                     |

|                                  |  |   |   |   |   |   |   |
|----------------------------------|--|---|---|---|---|---|---|
| Activities performed by visitors |  | 3 | 3 | 3 | 4 | 4 | 4 |
| Climate change                   |  | 3 | 3 | 4 | 4 | 4 | 3 |
