# Supplementary material
Source: MDPI journal article supplement (https://www.mdpi.com/2076-3298/4/4/68)
Supplement: s1 [file s1]

## Supplementary 3

### Results by indicator and national park

#### 1. STATE OF CONSERVATION

##### 1.1. Endangered species' population trends

###### ▪ Ordesa NP

There are two species included as 'Endangered' the Spanish Threatened Species Catalogue that dwell Ordesa NP regularly: *Cypripedium calceolus* and *Gypaetus barbatus*. There are two other 'Endangered' species with sporadic presence in the NP: *Myotis capaccinii* and *Ursus arctos*. Population trends of both endangered species regularly present in Ordesa NP (Ordesa, Tormosa and Soaso) are shown in the table below.

| Species                      | Number of individuals<br>2012              | Number of individuals<br>2013              | Number of individuals<br>2014              | Number of individuals<br>2015              | Value |
|------------------------------|--------------------------------------------|--------------------------------------------|--------------------------------------------|--------------------------------------------|-------|
| <i>Cypripedium calceolus</i> | 907                                        | 1.159                                      | 1.644                                      |                                            | 2     |
| Species                      | Number of reproduction<br>units<br>2012-13 | Number of reproduction<br>units<br>2013-14 | Number of reproduction<br>units<br>2014-15 | Number of reproduction<br>units<br>2015-16 | Value |
| <i>Gypaetus barbatus</i> *   | 12                                         | 12                                         | 12                                         | 12                                         | 1     |
| VALUE                        |                                            |                                            |                                            |                                            | 2     |

\*NP's administration data (Elena Villagrasa comm. pers.)

###### ▪ Guadarrama NP

Data to evaluate this indicator could not be retrieved.

#### References:

Goñi, D. 2012. Ejecución del plan de recuperación de *Cypripedium calceolus*. Memoria 2012. Departamento de Medio Ambiente, Gobierno de Aragón y Larre.

Goñi, d. 2014. Ejercución de los Planes de Recuperación de *Borderea chouardii* y *Cypripedium calceolus*. Memoria de 2014. Larre.

Goñi, D. 2015. Seguimiento de poblaciones fundadas y reforzamientos de las especies *Borderea chouardii* y *Cypripedium calceolus*. Memoria de 2014. Larre.

Goñi, D., García, M. B. y Guzmán D. 2015. *Seguimiento de la flora vascular de España. Seguimiento demográfico y estado de conservación de *Borderea chouardii* y *Cypripedium calceolus* (Zapatito de La Dama)*. Dirección General de Calidad y Evaluación Ambiental y Medio Natural, Ministerio de Agricultura, Alimentación y Medio Ambiente. Madrid.

## 1.2. Changes in the extent of focal habitats

- Ordesa NP

No comparable focal habitat data were available.

- Guadarrama NP

Data to evaluate this indicator could not be retrieved.

## 1.3. Changes in the features for which the PA was designated

- Ordesa NP

Air quality and geomorphology were among the features to be preserved according to the NP's designation norm (Spanish Government, 1982), but there were no updated data on them.

- Guadarrama NP

The conservation objectives in the NP's designation norm (Spanish Government, 2013) are too generic to be evaluated.

## References:

Spanish Government. 1982. Ley 52/1982, de 13 de Julio, de reclasificación y ampliación del Parque Nacional de Ordesa y Monte Perdido. *Boletín Oficial del Estado*, 131: 20627-20629.

Spanish Government. 2013. Ley 7/2013, de 25 de junio, de declaración del Parque Nacional de la Sierra de Guadarrama. *Boletín Oficial del Estado*, 152: 47795-47852.

## 1.4. Visual impact

- Ordesa NP

The average, weighted visual impact in and around Ordesa NP was 2.2 (CNIG, 2009, 2010).

- Guadarrama NP

The average, weighted visual impact in and around Guadarrama NP was 8.4 (CNIG, 2009, 2010).

**References:**

CNIG, 2009, BTN25, Base Topográfica Nacional a escala 1:25.000

<http://centrodedescargas.cnig.es/CentroDescargas/linkUnMD>

CNIG, 2010, MDT25, Modelo digital del terreno con paso de malla de 25 m

<http://centrodedescargas.cnig.es/CentroDescargas/linkUnMD>

## 1.5. Surface water quality

- Both NPs

| 2015          |                      |                             |            |                        |                                 |                         |      |                         |                 |                 |                 |                |                |
|---------------|----------------------|-----------------------------|------------|------------------------|---------------------------------|-------------------------|------|-------------------------|-----------------|-----------------|-----------------|----------------|----------------|
| National Park | River/lake/dam       | Municipality                | Date       | Number of measurements | Dissolved O <sub>2</sub> (mg/l) | BOD <sub>5</sub> (mg/l) | pH   | Total Phosphorus (mg/l) | Nitrates (mg/l) | Nitrites (mg/l) | Ammonium (mg/l) | Q <sub>i</sub> | Q <sub>w</sub> |
| Ordesa        | River Arazas         | Torla                       | 15/06/2015 | 1                      | 9.30                            |                         | 8.10 | 0.05                    | 1.00            | 0.02            | 0.13            | 6              | 2              |
| Guadarrama    | Dam of Pinilla       | Lozoya                      | 2015       | 12<br>(1 for total P)  | 9.98                            | 2.34                    | 7.49 | 0.02                    | 1.03            | 0.02            | 0.07            | 7              |                |
| Guadarrama    | River Canencia       | Canencia                    | 2015       | 4                      | 10.08                           | 2.00                    | 7.38 | 0.05                    | 2.50            | 0.05            | 0.10            | 7              |                |
| Guadarrama    | Lake Los pájaros     | Rascafría                   | 21/05/2015 | 1                      | 9.80                            | 2.00                    | 6.60 | 0.05                    | 2.50            | 0.05            | 0.10            | 7              |                |
| Guadarrama    | Wetland lake complex | Rascafría                   | 21/05/2015 | 1                      | 9.50                            | 2.00                    | 6.70 | 0.05                    | 2.50            | 0.05            | 0.10            | 7              |                |
| Guadarrama    | Big lake of Peñalara | Rascafría                   | 21/05/2015 | 1                      | 9.20                            | 2.00                    | 6.50 | 0.05                    | 2.50            | 0.05            | 0.10            | 7              |                |
| Guadarrama    | River Manzanares     | Manzanares El Real          | 2015       | 4                      | 10.23                           | 2.00                    | 7.45 | 0.05                    | 2.50            | 0.05            | 0.10            | 7              |                |
| Guadarrama    | River Navalmedio     | Cercedilla                  | 2015       | 4                      | 10.03                           | 2.00                    | 7.28 | 0.07                    | 2.50            | 0.05            | 0.10            | 7              |                |
| Guadarrama    | River Moros          | El Espinar                  | 2015       | 6                      | 9.10                            | 1.00                    | 7.48 |                         | 0.10            |                 | 0.13            | 5              |                |
| Guadarrama    | Dam of Peces         | Navas de Riofrío            | 2015       | 4                      | 7.81                            | 3.00                    | 7.22 | 0.02                    | 0.13            | 0.01            | 0.10            | 7              |                |
| Guadarrama    | River Frío           | Real Sitio de San Ildefonso | 2015       | 4                      | 9.17                            | 1.00                    | 7.56 |                         | 0.10            |                 | 0.13            | 5              |                |

| National Park | River/lake/dam         | Municipality                | Date | Number of measurements | Dissolved O <sub>2</sub> (mg/l) | BOD <sub>5</sub> (mg/l) | pH   | Total Phosphorus (mg/l) | Nitrates (mg/l) | Nitrites (mg/l) | Ammonium (mg/l) | Q <sub>i</sub> | Q <sub>w</sub> |
|---------------|------------------------|-----------------------------|------|------------------------|---------------------------------|-------------------------|------|-------------------------|-----------------|-----------------|-----------------|----------------|----------------|
| Guadarrama    | River Eresma           | Real Sitio de San Ildefonso | 2015 | 8                      | 10.03                           | 1.00                    | 7.50 | 0.01                    | 0.91            | 0.02            | 0.11            | 7              |                |
| Guadarrama    | River Cambrones        | Real Sitio de San Ildefonso |      |                        |                                 |                         |      |                         |                 |                 |                 |                |                |
| Guadarrama    | Dam of Torrecaballeros | Santo Domingo de Pirón      | 2015 | 5                      | 8.78                            | 1.00                    | 7.89 | 0.01                    | 0.58            | 0.02            | 0.13            | 7              | <b>2</b>       |

| 2014          |                      |              |                  |                        |                                 |                         |      |                         |                 |                 |                 |                |                |
|---------------|----------------------|--------------|------------------|------------------------|---------------------------------|-------------------------|------|-------------------------|-----------------|-----------------|-----------------|----------------|----------------|
| National Park | River/lake / dam     | Municipality | Date             | Number of measurements | Dissolved O <sub>2</sub> (mg/l) | BOD <sub>5</sub> (mg/l) | pH   | Total Phosphorus (mg/l) | Nitrates (mg/l) | Nitrites (mg/l) | Ammonium (mg/l) | Q <sub>i</sub> | Q <sub>w</sub> |
| Ordesa        | River Arazas         | Torla        | 18/06/2014       | 1                      | 9.80                            |                         | 7.80 | 0.05                    | 1.00            | 0.02            | 0.13            | 6              | <b>2</b>       |
| Guadarrama    | Dam of Pinilla       | Lozoya       | 2014             | 12                     | 10.10                           | 2.25                    | 7.53 | 0.02                    | 1.25            | 0.02            | 0.09            | 7              |                |
| Guadarrama    | River Canencia       | Canencia     | 02,05,08,11/2014 | 4                      | 10.35                           | 2.00                    | 7.3  | 0.05                    | 2.50            | 0.05            | 0.10            | 7              |                |
| Guadarrama    | Lake Los pájaros     | Rascafría    | 19/05/2014       | 1                      | 8.30                            | 2.00                    | 7.4  | 0.05                    | 2.50            | 0.05            | 0.10            | 7              |                |
| Guadarrama    | Wetland lake complex | Rascafría    | 19/05/2014       | 1                      | 8.90                            | 2.00                    | 6.7  | 0.15                    | 2.50            | 0.05            | 0.10            | 7              |                |
| Guadarrama    | Big lake             | Rascafría    | 19/05/           | 1                      | 8.90                            | 2.00                    | 6.9  | 0.05                    | 2.50            | 0.05            | 0.10            | 7              |                |

|            |                        |                             |                     |     |       |      |      |      |      |       |      |   |          |
|------------|------------------------|-----------------------------|---------------------|-----|-------|------|------|------|------|-------|------|---|----------|
|            | of Peñalara            |                             | 2014                |     |       |      |      |      |      |       |      |   |          |
| Guadarrama | River Manzanares       | Manzanares El Real          | 02,05,08,11/2014    | 4   | 10.13 | 2.00 | 7.25 | 0.07 | 2.5  | 0.05  | 0.10 | 7 |          |
| Guadarrama | River Navalmedio       | Cercedilla                  | 02,05,08,11/2014    | 4   | 9.98  | 2.00 | 7.5  | 0.05 | 2.5  | 0.05  | 0.10 | 7 |          |
| Guadarrama | River Moros            | El Espinar                  | 2014 (P Total 2013) | 12? | 10.59 | 1    | 7.31 | 0.02 | 0.83 |       | 0.03 | 6 |          |
| Guadarrama | Dam of Peces           | Navas de Riofrío            | 2014                | 5   | 9.205 | 1.00 | 7.98 | 0.03 | 0.32 | 0.02  | 0.05 | 7 |          |
| Guadarrama | River Frío             | Real Sitio de San Ildefonso | 2014                | 12? | 8.69  | 1.00 | 7.19 | 0.03 | 0.60 |       | 0.05 | 6 |          |
| Guadarrama | River Eresma           | Real Sitio de San Ildefonso | 2014                | 12? | 8.80  | 1.00 | 7.38 | 0.13 | 1.7  |       | 0.03 | 6 |          |
| Guadarrama | River Cambrones        | Real Sitio de San Ildefonso | 2013                | 12? | 8.85  | 1.00 | 7.38 | 0.09 | 2.7  |       | 0.24 | 6 |          |
| Guadarrama | Dam of Torrecaballeros | Santo Domingo de Pirón      | 2014                | 5   | 9.24  | 1.00 | 7.07 | 0.02 | 0.75 | 0.015 | 0.04 | 7 | <b>2</b> |

## 1.6. Health of vegetation

- Both NPs

| Ordesa NP |                         |       |                              |                               |                              |                               |                              |                               |
|-----------|-------------------------|-------|------------------------------|-------------------------------|------------------------------|-------------------------------|------------------------------|-------------------------------|
| Zone      | Species                 | n     | Average defoliation 2015 (%) | Average decoloration 2015 (%) | Average defoliation 2013 (%) | Average decoloration 2013 (%) | Average defoliation 2012 (%) | Average decoloration 2012 (%) |
| NP        | <i>Fagus sylvatica</i>  | 24    | 26.88                        | 0                             | 24.79                        | 0                             | 23.75                        | 0.42                          |
| NP        | <i>Pinus uncinata</i>   | 24    | 21.46                        | 0                             | 17.92                        | 0                             | 25.83                        | 0.04                          |
| NP        | <i>Pinus sylvestris</i> | 24    | 22.29                        | 0                             | 21.88                        | 0                             | 25                           | 0.17                          |
| PPZ       | <i>Pinus sylvestris</i> | 24    | 23.33                        | 0                             | 21.46                        | 0                             | 21.46                        | 0                             |
| PPZ       | <i>Pinus sylvestris</i> | 24    | 22.92                        | 0                             | 22.71                        | 0                             | 23.54                        | 0.04                          |
|           |                         | Value | 1                            | 2                             |                              |                               |                              |                               |
|           |                         | VALUE | 1                            |                               |                              |                               |                              |                               |

| Guadarrama NP |      |                         |    |                              |                               |                              |                               |                              |                               |                              |                               |
|---------------|------|-------------------------|----|------------------------------|-------------------------------|------------------------------|-------------------------------|------------------------------|-------------------------------|------------------------------|-------------------------------|
| Province      | Zone | Species                 | n  | Average defoliation 2015 (%) | Average decoloration 2015 (%) | Average defoliation 2014 (%) | Average decoloration 2014 (%) | Average defoliation 2013 (%) | Average decoloration 2013 (%) | Average defoliation 2012 (%) | Average decoloration 2012 (%) |
| Segovia       | PN   | <i>Pinus sylvestris</i> | 12 | 29.00                        | 0.00                          | 29.60                        | 0.00                          | No data                      | No data                       | No data                      | No data                       |
| Segovia       | ZPP  | <i>Pinus sylvestris</i> | 12 | 23.10                        | 0.00                          | 23.30                        | 0.00                          | No data                      | No data                       | No data                      | No data                       |

Fine-tuning of a protected area effectiveness evaluation tool: implementation on two emblematic Spanish National Parks

|                 |     |                          |    |       |      |       |      |         |         |         |         |
|-----------------|-----|--------------------------|----|-------|------|-------|------|---------|---------|---------|---------|
| Segovia         | ZPP | <i>Pinus sylvestris</i>  | 12 | 18.80 | 0.00 | 18.10 | 0.00 | No data | No data | No data | No data |
| Segovia         | ZPP | <i>Pinus sylvestris</i>  | 12 |       |      | 19.60 | 0.00 | No data | No data | No data | No data |
| Segovia         | ZPP | <i>Pinus sylvestris</i>  | 12 |       |      | 18.30 | 0.00 | No data | No data | No data | No data |
| Segovia         | ZPP | <i>Pinus sylvestris</i>  | 12 |       |      | 21.30 | 0.00 | No data | No data | No data | No data |
| Segovia         | ZPP | <i>Pinus sylvestris</i>  | 12 |       |      | 22.70 | 0.00 | No data | No data | No data | No data |
| Average Segovia |     |                          |    | 23.63 | 0.00 | 21.84 | 0.00 | No data | No data | No data | No data |
|                 |     |                          |    |       |      |       |      |         |         |         |         |
| Madrid          | PN  | <i>Pinus sylvestris</i>  | 30 | 14.00 | 0.00 | 13.83 | 0.00 | 13.50   | 0.00    | 13.67   | 0.00    |
| Madrid          | ZPP | <i>Quercus pyrenaica</i> | 30 | 17.17 | 0.00 | 16.83 | 0.00 | 16.83   | 0.00    | 17.00   | 0.00    |
| Madrid          | ZPP | <i>Quercus pyrenaica</i> | 30 | 21.50 | 0.00 | 23.00 | 0.00 | 25.33   | 0.00    | 31.83   | 0.07    |
| Madrid          | ZPP | <i>Quercus pyrenaica</i> | 30 | 21.17 | 0.00 | 20.50 | 0.00 | 21.00   | 0.00    | 23.33   | 0.00    |
| Madrid          | PN  | <i>Pinus sylvestris</i>  | 30 | 13.00 | 0.00 | 13.00 | 0.00 | 13.00   | 0.00    | 13.33   | 0.00    |
| Madrid          | ZPP | <i>Pinus sylvestris</i>  | 30 | 14.33 | 0.00 | 13.83 | 0.00 | 13.83   | 0.00    | 13.83   | 0.00    |
| Madrid          | ZPP | <i>Quercus pyrenaica</i> | 30 | 27.83 | 0.00 | 27.67 | 0.00 | 32.00   | 0.27    | 37.83   | 0.27    |
| Madrid          | ZPP | <i>Pinus sylvestris</i>  | 30 | 15.00 | 0.00 | 15.00 | 0.00 | 14.50   | 0.00    | 14.00   | 0.00    |
| Madrid          | PN  | <i>Pinus sylvestris</i>  | 30 | 13.50 | 0.00 | 13.33 | 0.00 | 13.00   | 0.00    | 16.00   | 0.13    |
| Madrid          | ZPP | <i>Quercus</i>           | 30 | 18.50 | 0.00 | 19.00 | 0.00 | 22.67   | 0.13    | 23.50   | 0.30    |



Fine-tuning of a protected area effectiveness evaluation tool: implementation on two emblematic Spanish National Parks

|                         |     |                              |              |              |             |              |             |              |             |              |             |
|-------------------------|-----|------------------------------|--------------|--------------|-------------|--------------|-------------|--------------|-------------|--------------|-------------|
|                         |     | <i>pyrenaica</i>             |              |              |             |              |             |              |             |              |             |
| Madrid                  | ZPP | <i>Pinus sylvestris</i>      | 30           | 14.17        | 0.00        | 13.83        | 0.00        | 14.33        | 0.00        | 14.50        | 0.00        |
| Madrid                  | ZPP | <i>Fraxinus angustifolia</i> | 30           | 31.50        | 0.00        | 32.50        | 0.00        | 40.67        | 0.10        | 53.33        | 0.00        |
| Madrid                  | ZPP | <i>Pinus nigra</i>           | 30           | 15.33        | 0.00        | 15.33        | 0.00        | 15.67        | 0.00        | 16.67        | 0.00        |
| Madrid                  | ZPP | <i>Pinus sylvestris</i>      | 30           | 17.67        | 0.00        | 17.00        | 0.00        | 16.33        | 0.00        | 18.83        | 0.00        |
| Madrid                  | PN  | <i>Pinus sylvestris</i>      | 31           | 13.50        | 0.00        | 13.50        | 0.00        | 13.83        | 0.00        | 14.17        | 0.00        |
| Average Madrid          |     |                              |              | <b>17.88</b> | <b>0.00</b> | <b>17.88</b> | <b>0.00</b> | <b>19.10</b> | <b>0.03</b> | <b>21.46</b> | <b>0.05</b> |
| TOTAL NP                |     |                              |              | 18.84        | 0.00        | 19.14        | 0.00        |              |             |              |             |
| <b>TOTAL NP 2014-15</b> |     |                              |              |              |             | <b>18.99</b> | <b>0.00</b> |              |             |              |             |
|                         |     |                              | Value        | 1            | 2           |              |             |              |             |              |             |
|                         |     |                              | <b>VALUE</b> | <b>1</b>     |             |              |             |              |             |              |             |

## 2. PLANNING

### 2.1. Appropriateness of protection legislation

- Both NPs

| National Park | Designated after<br>27/03/1989 | Updated network<br>plan | VALUE |
|---------------|--------------------------------|-------------------------|-------|
| Ordesa        | No                             | Yes (2016)              | 1     |
| Guadarrama    | Yes                            | Yes (2016)              | 2     |

#### References:

Spanish Government. 1982. Ley 52/1982, de 13 de Julio, de reclasificación y ampliación del Parque Nacional de Ordesa y Monte Perdido. *Boletín Oficial del Estado*, 131: 20627-20629.

Spanish Government. 2013. Ley 7/2013, de 25 de junio, de declaración del Parque Nacional de la Sierra de Guadarrama. *Boletín Oficial del Estado*, 152: 47795-47852.

Spanish Government. 2016. Real Decreto 389/2016, de 22 de octubre, por el que se aprueba el Plan Director de la Red de Parques Nacionales. *Boletín Oficial del Estado*, 257: 74051-74076.

### 2.2. Existence of updated management plan

- Both NPs.

| National Park | Management plan | Updated                                     | VALUE |
|---------------|-----------------|---------------------------------------------|-------|
| Ordesa        | Yes             | Yes (passed in 2015, with 10-year validity) | 2     |
| Guadarrama    | No              |                                             | 0     |

#### References:

Government of Aragon. 2015. Decreto 49/2015, de 8 de abril, del Gobierno de Aragón, por el que aprueba el Plan Rector de Uso y Gestión del Parque Nacional de Ordesa y Monte Perdido. *Boletín Oficial de Aragón*, 80: 13026-13028.

### 2.3. Existence of updated socioeconomic plan

- Both NPs

| National Park | Plan/Programme/<br>Guidelines | Individual<br>plan/programme | Updated         | VALUE |
|---------------|-------------------------------|------------------------------|-----------------|-------|
| Ordesa        | Yes                           | No (in management            | Yes (management | 2     |

|            |     | plan: headings<br>10.7.1 & 10.7.2)                               | plan passed<br>in 2015, with<br>10-year<br>validity)                                      |   |
|------------|-----|------------------------------------------------------------------|-------------------------------------------------------------------------------------------|---|
| Guadarrama | Yes | No (in natural<br>resources plan:<br>headings A.2.10<br>& A.3.9) | Yes (natural<br>resources<br>plan passed<br>in 2009-10,<br>with<br>unlimited<br>validity) | 2 |

## References:

Government of Madrid. 2009. DECRETO 96/2009, de 18 de noviembre, del Consejo de Gobierno, por el que se aprueba la ordenación de los recursos naturales de la Sierra de Guadarrama en el ámbito territorial de la Comunidad de Madrid. *Boletín Oficial de la Comunidad de Madrid*, 11: 4-131.

Government of Castilla y León. 2010. DECRETO 4/2010, de 14 de enero, por el que se aprueba el Plan de Ordenación de los Recursos Naturales del Espacio Natural «Sierra de Guadarrama» (Segovia y Ávila). *Boletín Oficial de Castilla y León*, 12: 3517-3590.

Government of Aragon. 2015. Decreto 49/2015, de 8 de abril, del Gobierno de Aragón, por el que aprueba el Plan Rector de Uso y Gestión del Parque Nacional de Ordesa y Monte Perdido. *Boletín Oficial de Aragón*, 80: 13026-13028.

## 3. MANAGEMENT

### 3.1. Degree of fulfilment of management objectives

- Ordesa NP

A meaningful way of evaluating this indicator according to existing data could be found for Ordesa NP. Existing data included either expenditure data on management actions or numerous, multi-year management measures aggregated in different manners.

- Guadarrama NP

Data to evaluate this indicator could not be retrieved.

### 3.2. Effectiveness of public participation bodies

- Both NPs

| National Park | Public participation body                    | Meetings/year | Year (number of meetings)                | VALUE    |
|---------------|----------------------------------------------|---------------|------------------------------------------|----------|
| Ordesa        | Patronato                                    | 1,75          | 2012(1),<br>2013(2),<br>2014(2), 2015(2) | <b>2</b> |
| Guadarrama    | Patronato<br>(establishment date 09/06/2014) | 1             | 2014(1), 2015(1)                         | <b>1</b> |

## References:

MAGRAMA. 2012, 2013, 2014, 2015. *Memoria de la Red de Parques Nacionales 2012, 2013, 2014, 2015*. Organismo Autónomo Parques Nacionales. Madrid.

### 3.3. Existence of sufficient management staff

| National Park | Staff        | Density (workers/10 <sup>3</sup> ha) | Value | Surveillance  | Value | VALUE    |
|---------------|--------------|--------------------------------------|-------|---------------|-------|----------|
| Ordesa        | 35<br>(2015) | 2,24                                 | 0     | 7 days / week | 2     | <b>1</b> |
| Guadarrama    |              |                                      |       |               |       |          |

No data could be retrieved for Guadarrama NP.

### 3.4. Existence of environmental education and volunteering activities

- Ordesa NP
  - Environmental education activities: Education programme in schools of the socioeconomic influence zone; guided tours to visitors.
  - Environmental volunteering activities: 3 actions within the National Park Environmental Volunteering Programme by ACA, Asociación Herpetológica Española and Cruz Roja Española.
- Guadarrama NP
  - Environmental education activities (2014 and 2015): Environmental education programmes in visitor centres (peripheral areas, local schools, free entrance to schoolchildren, promotion of sustainable economy in the peripheral zone, Nature

Train, National Park's Bus, Meeting Point, CENEAM summer walks & CENEAM didactic walks around Valsáin)

- Environmental volunteering activities (2014): Environmental volunteering in visitor centres; support to global change monitoring in mountain freshwater ecosystems (by ACA); International work camp by Youth Directorate General; Virtual biodiversity in PAs of the Region of Madrid.

## References:

MAGRAMA. 2014, 2015. *Memoria de la Red de Parques Nacionales 2014, 2015*. Organismo Autónomo Parques Nacionales. Madrid.

## 4. SOCIOECONOMIC CONTEXT

### 4.1. Local population density

- Ordesa NP

| Province      | Municipality       | Area (km <sup>2</sup> ) | Population<br>2015 | Population<br>2016 | VALUE    |
|---------------|--------------------|-------------------------|--------------------|--------------------|----------|
| Huesca        | Bielsa             | 202.41                  | 488                | 483                |          |
| Huesca        | Broto              | 128.50                  | 532                | 532                |          |
| Huesca        | Fanlo              | 187.10                  | 112                | 107                |          |
| Huesca        | Puértolas          | 99.86                   | 207                | 213                |          |
| Huesca        | Tella-Sin          | 90.33                   | 249                | 243                |          |
| Huesca        | Torla              | 185.21                  | 306                | 305                |          |
| <b>Huesca</b> | <b>TOTAL PN</b>    | <b>893.41</b>           | <b>1,894</b>       | <b>1,883</b>       |          |
|               | <b>Ordesa</b>      |                         |                    |                    |          |
|               | <b>Densidad PN</b> |                         | <b>2.12</b>        | <b>2.11</b>        | <b>0</b> |
|               | <b>Ordesa</b>      |                         |                    |                    |          |

- Guadarrama NP

| Province | Municipality          | Area (km <sup>2</sup> ) | Population<br>2015 | Population<br>2016 | VALUE |
|----------|-----------------------|-------------------------|--------------------|--------------------|-------|
| Madrid   | Alameda del Valle     | 25.72                   | 217                | 208                |       |
| Madrid   | Becerril de la Sierra | 30.53                   | 5,396              | 5,439              |       |
| Madrid   | El Boalo              | 39.45                   | 7,157              | 7,225              |       |
| Madrid   | Canencia              | 54.15                   | 464                | 451                |       |
| Madrid   | Cercedilla            | 35.74                   | 6,781              | 6,751              |       |
| Madrid   | Guadarrama            | 57.16                   | 15,538             | 15,488             |       |
| Madrid   | Lozoya                | 57.82                   | 594                | 576                |       |
| Madrid   | Manzanares el Real    | 126.83                  | 8,309              | 8,387              |       |
| Madrid   | Miraflores de la      | 56.41                   | 5,807              | 5,754              |       |

|         |                                                        |                |                |                |          |
|---------|--------------------------------------------------------|----------------|----------------|----------------|----------|
|         | Sierra                                                 |                |                |                |          |
| Madrid  | Los Molinos                                            | 19.17          | 4,349          | 4,373          |          |
| Madrid  | Navacerrada                                            | 27.51          | 2,855          | 2,885          |          |
| Madrid  | Navarredonda y San Mamés                               | 28.48          | 136            | 132            |          |
| Madrid  | Pinilla del Valle                                      | 25.42          | 200            | 192            |          |
| Madrid  | Rascafría                                              | 149.23         | 1,739          | 1,692          |          |
| Madrid  | Soto del Real                                          | 42.83          | 8,456          | 8,483          |          |
|         | <b>TOTAL Madrid</b>                                    | <b>776.46</b>  | <b>67,998</b>  | <b>68,036</b>  |          |
| Segovia | Aldealengua de Pedraza                                 | 35.06          | 83             | 82             |          |
| Segovia | Basardilla                                             | 19.04          | 137            | 143            |          |
| Segovia | Collado Hermoso                                        | 16.37          | 145            | 136            |          |
| Segovia | El Espinar                                             | 204.99         | 9,486          | 9,212          |          |
| Segovia | Gallegos                                               | 21.77          | 94             | 94             |          |
| Segovia | La Losa                                                | 27.99          | 535            | 533            |          |
| Segovia | Navafría                                               | 30.44          | 324            | 321            |          |
| Segovia | Navas de Riofrío                                       | 14.85          | 421            | 423            |          |
| Segovia | Ortigosa del Monte                                     | 15.41          | 547            | 552            |          |
| Segovia | Otero de Herreros                                      | 43.69          | 981            | 971            |          |
| Segovia | Palazuelos de Eresma                                   | 36.70          | 4,986          | 5,052          |          |
| Segovia | Real Sitio de San Ildefonso                            | 144.84         | 5,403          | 5,352          |          |
| Segovia | Santiuste de Pedraza                                   | 29.12          | 111            | 104            |          |
| Segovia | Santo Domingo de Pirón                                 | 27.57          | 62             | 62             |          |
| Segovia | Segovia                                                | 163.50         | 52,728         | 52,257         |          |
| Segovia | Sotosalbos                                             | 23.91          | 118            | 115            |          |
| Segovia | Torrecañaballeros                                      | 42.23          | 1,288          | 1,299          |          |
| Segovia | Torre Val de San Pedro                                 | 44.26          | 196            | 190            |          |
| Segovia | Treccasas                                              | 32.67          | 1,007          | 1,055          |          |
|         | <b>TOTAL Segovia</b>                                   | <b>974.38</b>  | <b>78,652</b>  | <b>77,953</b>  |          |
|         | <b>TOTAL SIZ Guadarrama</b>                            | <b>1750.84</b> | <b>146,650</b> | <b>145,989</b> |          |
|         | <b>Densidad SIZ Guadarrama (inh. / km<sup>2</sup>)</b> |                | <b>83.76</b>   | <b>83.38</b>   | <b>2</b> |

#### 4.2. Land use changes

- Ordesa NP

No changes were detected in either the NP or its PPZ using Corine Land Cover data from 2006 and 2012 (Copernicus, 2016<sub>a,b</sub>).

- Guadarrama NP

Land use changes between 2006 and 2012 were not analysed because Guadarrama NP was designated in 2013.

## References:

- Copernicus Land Monitoring Services. 2016<sub>a</sub>. *Pan-European. Corine Land Cover. CLC 2006. 18.5 version*. Available online from: <http://land.copernicus.eu/pan-european/corine-land-cover/clc-2006/view> (Accessed 31/10/2016)
- Copernicus Land Monitoring Services. 2016<sub>b</sub>. *Pan-European. Corine Land Cover. CLC 2012. 18.5 version*. Available online from: <http://land.copernicus.eu/pan-european/corine-land-cover/clc-2012/view> (Accessed 17/10/2016).

## 5. SOCIAL PERCEPTION AND VALUATION

### 5.1. Degree of knowledge on the PA

- Ordesa NP

Ninety-nine point one per cent of the sample of local residents (n=111) knew about the NP.

- Guadarrama NP

Ninety-seven point seven per cent of the sample of local residents (n=260) knew about the NP.

### 5.2. Personal importance

- Ordesa NP

The NP is 'very important' or 'quite important' for 89.2% of residents.

- Guadarrama NP

The NP is 'very important' or 'quite important' for 82.4% of residents.

## 6. THREATS TO CONSERVATION

### 6.1. Fragmentation

- Ordesa NP

No increase in artificial covers either in the NP or in its PPZ was detected between 2006 and 2012 using Corine Land Cover Data (Copernicus, 2016<sub>a, b</sub>).

- Guadarrama NP

Natural and semi-natural habitat fragmentation between 2006 and 2012 was not analysed because Guadarrama NP was designated in 2013.

## References:

Copernicus Land Monitoring Services. 2016<sub>a</sub>. *Pan-European. Corine Land Cover. CLC 2006. 18.5 version*. Available online from: <http://land.copernicus.eu/pan-european/corine-land-cover/clc-2006/view> (Accessed 31/10/2016)

Copernicus Land Monitoring Services. 2016<sub>b</sub>. *Pan-European. Corine Land Cover. CLC 2012. 18.5 version*. Available online from: <http://land.copernicus.eu/pan-european/corine-land-cover/clc-2012/view> (Accessed 17/10/2016).

## 6.2. Density of alien invasive species

- Ordesa NP

In 2016, 10 alien invasive species were identified in the NP.

| Family                         | Genus             | Species                |
|--------------------------------|-------------------|------------------------|
| <i>Liliaceae</i>               | <i>Asparagus</i>  | <i>officinalis</i>     |
| <i>Cruciferae</i>              | <i>Bunias</i>     | <i>orientalis</i>      |
| <i>Juglandaceae</i>            | <i>Juglans</i>    | <i>regia</i>           |
| <i>Leguminosae</i>             | <i>Medicago</i>   | <i>sativa</i>          |
| <i>Rosaceae</i>                | <i>Prunus</i>     | <i>domestica</i>       |
| <i>Rosaceae</i>                | <i>Prunus</i>     | <i>dulcis</i>          |
| <i>Rosaceae</i>                | <i>Pyrus</i>      | <i>communis</i>        |
| <i>Rosaceae</i>                | <i>Rosa</i>       | <i>gallica</i>         |
| <i>Rubiaceae</i>               | <i>Rubia</i>      | <i>tinctorium</i>      |
| <i>Salmonidae</i>              | <i>Salvelinus</i> | <i>Fontinalis</i>      |
| Number of AIS                  |                   | 10                     |
| Density of AIS (species / ha.) |                   | 6,4 x 10 <sup>-4</sup> |
| VALUE                          |                   | 0                      |

- Guadarrama NP

Data to evaluate this indicator could not be retrieved.



### 6.3. Density of visitors

- Both NPs

| National Park | Area (ha.) | Visitors 2014 | Visitors 2015 | Density 2014 (vis/ha) | Density 2015 (vis/ha) | VALUE    |
|---------------|------------|---------------|---------------|-----------------------|-----------------------|----------|
| Ordesa        | 15,608     | 590,050       | 598,950       | 37.80                 | 38.37                 | <b>1</b> |
| Guadarrama    | 33,960     | 2,941,636     | 2,989,556     | 86.62                 | 88.03                 | <b>2</b> |

### 6.4. Activities performed by visitors

- Ordesa NP

Hiking, bird-watching and mountaineering.

- Guadarrama NP

Data to evaluate this indicator could not be retrieved.

#### References:

Government of Madrid. 2009. DECRETO 96/2009, de 18 de noviembre, del Consejo de Gobierno, por el que se aprueba la ordenación de los recursos naturales de la Sierra de Guadarrama en el ámbito territorial de la Comunidad de Madrid. *Boletín Oficial de la Comunidad de Madrid*, 11: 4-131.

Government of Castilla y León. 2010. DECRETO 4/2010, de 14 de enero, por el que se aprueba el Plan de Ordenación de los Recursos Naturales del Espacio Natural «Sierra de Guadarrama» (Segovia y Ávila). *Boletín Oficial de Castilla y León*, 12: 3517-3590.

Spanish Government. 2014. Ley 30/2014, de 3 de diciembre, de Parques Nacionales. *Boletín Oficial del Estado*, 293: 99762-99792

Government of Aragon. 2015. Decreto 49/2015, de 8 de abril, del Gobierno de Aragón, por el que aprueba el Plan Rector de Uso y Gestión del Parque Nacional de Ordesa y Monte Perdido. *Boletín Oficial de Aragón*, 80: 13026-13028.

### 6.5. Climate change

- Ordesa NP

Climatic data come from Goriz meteorological station (2,200 masl).

For temperature, mean annual temperatures from monthly means in two consecutive periods of 18 years (1982-1999) and 17 years (2000-2016) were compared. Mean annual temperature increased by 0.35 °C between both periods.

| Temperature (°C x 10) |      |     |     |     |     |     |     |     |     |     |     |     |        |             |
|-----------------------|------|-----|-----|-----|-----|-----|-----|-----|-----|-----|-----|-----|--------|-------------|
| Year                  | Jan  | Feb | Mar | Apr | May | Jun | Jul | Aug | Sep | Oct | Nov | Dec | Annual | Annual (°C) |
| 1982                  | 6    | -2  | -15 | 28  | 50  | 99  | 137 | 116 | 89  | 40  | 19  | -10 | 46.42  | 4.64        |
| 1983                  | 44   | -37 | 19  | -1  | 28  | 99  | 145 | 107 | 116 | 74  | 35  | 16  | 53.75  | 5.38        |
| 1984                  | -19  | -33 | -36 | 44  | 11  | 90  | 147 | 103 | 85  | 55  | 20  | -5  | 38.50  | 3.85        |
| 1985                  | -59  | 16  | -26 | 23  | 32  | 90  | 135 | 130 | 130 | 75  | 1   | 24  | 47.58  | 4.76        |
| 1986                  | -27  | -38 | 8   | -16 | 71  | 99  | 129 | 125 | 104 | 69  | 34  | 0   | 46.50  | 4.65        |
| 1987                  | -24  | -20 | -7  | 28  | 42  | 85  | 114 | 143 | 122 | 45  | 19  | 33  | 48.33  | 4.83        |
| 1988                  | -8   | -19 | 4   | 23  | 50  | 69  | 124 | 134 | 101 | 73  | 36  | 23  | 50.83  | 5.08        |
| 1989                  | 8    | -8  | 35  | -9  | 68  | 94  | 139 | 134 | 87  | 78  | 22  | 9   | 54.75  | 5.48        |
| 1990                  | 4    | 35  | 15  | 1   | 59  | 97  | 141 | 132 | 105 | 54  | 5   | -13 | 52.92  | 5.29        |
| 1991                  | -16  | -22 | 21  | 4   | 31  | 95  | 137 | 155 | 102 | 30  | 20  | 18  | 47.92  | 4.79        |
| 1992                  | -4   | 12  | 3   | 22  | 69  | 53  | 123 | 131 | 90  | 24  | 54  | 5   | 48.50  | 4.85        |
| 1993                  | 46   | -19 | 4   | 9   | 47  | 98  | 122 | 132 | 61  | 10  | 17  | 11  | 44.83  | 4.48        |
| 1994                  | -11  | -17 | 55  | -2  | 57  | 104 | 157 | 151 | 65  | 54  | 52  | 22  | 57.25  | 5.73        |
| 1995                  | -22  | 16  | 12  | 41  | 32  | 89  | 142 | 131 | 65  | 69  | 28  | -5  | 49.83  | 4.98        |
| 1996                  | -11  | -32 | 4   | 27  | 54  | 90  | 121 | 109 | 77  | 62  | 16  | -6  | 42.58  | 4.26        |
| 1997                  | -12  | 37  | 45  | 51  | 52  | 75  | 107 | 124 | 107 | 75  | 7   | -6  | 55.17  | 5.52        |
| 1998                  | -5   | 39  | 34  | -5  | 53  | 105 | 139 | 140 | 87  | 54  | 10  | 10  | 55.08  | 5.51        |
| 1999                  | 2    | -15 | 6   | 17  | 71  | 96  | 134 | 129 | 92  | 55  | 2   | 5   | 49.50  | 4.95        |
| Mean period 1         | 4.95 |     |     |     |     |     |     |     |     |     |     |     |        |             |
| 2000                  | -4   | 28  | 17  | 5   | 72  | 113 | 113 | 131 | 109 | 51  | -6  | -2  | 52.25  | 5.23        |
| 2001                  | -21  | 0   | 21  | 18  | 66  | 123 | 121 | 140 | 88  | 75  | 9   | 5   | 53.75  | 5.38        |
| 2002                  | 16   | 12  | 21  | 35  | 45  | 122 | 122 | 110 | 84  | 61  | 15  | 4   | 53.92  | 5.39        |
| 2003                  | -27  | -35 | 34  | 33  | 70  | 140 | 140 | 155 | 95  | 40  | 35  | -1  | 56.58  | 5.66        |

|               |          |     |     |    |    |     |     |     |     |    |     |     |       |      |
|---------------|----------|-----|-----|----|----|-----|-----|-----|-----|----|-----|-----|-------|------|
| 2004          | 0        | 6   | -8  | 9  | 52 | 118 | 123 | 124 | 115 | 58 | 31  | -4  | 52.00 | 5.20 |
| 2005          | 3        | -52 | 3   | 16 | 77 | 130 | 143 | 128 | 97  | 57 | 10  | -6  | 50.50 | 5.05 |
| 2006          | -10      | -5  | 10  | 41 | 78 | 117 | 149 | 113 | 105 | 78 |     | 14  | 62.73 | 6.27 |
| 2007          | 19       | 12  | 4   | 50 | 70 | 93  | 126 | 124 | 103 | 56 | 34  | -2  | 57.42 | 5.74 |
| 2008          |          | 25  | -9  | 12 | 35 | 79  |     | 119 | 75  | 42 | -11 | -15 | 35.20 | 3.52 |
| 2009          | -24      | -6  | 15  | 24 | 87 | 109 | 135 | 143 | 96  | 84 | 24  | -10 | 56.42 | 5.64 |
| 2010          | -31      | -42 | -12 | 32 | 38 | 89  | 150 | 136 | 94  |    | -7  | -18 | 39.00 | 3.90 |
| 2011          | -8       | 4   | 1   | 64 | 80 | 101 | 112 | 139 | 119 | 77 | 35  | 13  | 61.42 | 6.14 |
| 2012          | 14       | -43 | 23  | 2  | 76 | 118 | 128 | 152 | 101 | 59 | 20  | 6   | 54.67 | 5.47 |
| 2013          | -7       | -45 | -12 | 20 | 27 | 84  | 132 | 130 | 104 | 71 | 5   | 22  | 44.25 | 4.43 |
| 2014          | -10      | -24 | 12  | 50 | 49 | 97  | 114 | 117 | 110 |    | 24  |     | 53.90 | 5.39 |
| 2015          | -9       | -44 | 19  | 41 | 79 | 112 | 164 | 127 | 83  | 59 | 55  | 49  | 61.25 | 6.13 |
| 2016          | -3       | -6  | -12 | 18 | 46 | 105 | 142 | 152 | 111 | 72 | 16  | 38  | 56.58 | 5.66 |
| Mean period 2 | 5.30     |     |     |    |    |     |     |     |     |    |     |     |       |      |
| <b>Value</b>  | <b>1</b> |     |     |    |    |     |     |     |     |    |     |     |       |      |

For the analysis of precipitation, total precipitation in August for two consecutive periods of 20 years (1976-1999) and 17 years (2000-2016) were compared. The month of August was chosen because it had the most complete time series for the whole period. Mean precipitation in August decreased by 34% in both periods.

| Year                 | Precipitation in August (mm) |
|----------------------|------------------------------|
| 1976                 | 2,099                        |
| 1981                 | 779                          |
| 1982                 | 1,630                        |
| 1983                 | 1,784                        |
| 1984                 | 1,175                        |
| 1985                 | 130                          |
| 1986                 | 270                          |
| 1987                 | 1,148                        |
| 1988                 | 770                          |
| 1989                 | 1,030                        |
| 1990                 | 930                          |
| 1991                 |                              |
| 1992                 | 2,680                        |
| 1993                 | 1,781                        |
| 1994                 | 950                          |
| 1995                 | 985                          |
| 1996                 | 1,659                        |
| 1997                 | 3,072                        |
| 1998                 | 1,161                        |
| 1999                 | 1,048                        |
| <i>Mean Period 1</i> | <i>1,320</i>                 |
| 2000                 | 706                          |
| 2001                 | 723                          |
| 2002                 | 1,799                        |
| 2003                 | 447                          |
| 2004                 | 408                          |
| 2005                 | 1,062                        |
| 2006                 | 621                          |
| 2007                 | 2,102                        |
| 2008                 | 115                          |
| 2009                 | 1,145                        |
| 2010                 |                              |
| 2011                 | 1,189                        |
| 2012                 | 566                          |
| 2013                 | 610                          |

|                     |          |
|---------------------|----------|
| 2014                | 1,274    |
| 2015                |          |
| 2016                | 266      |
| <i>Mean Period2</i> | 869      |
| <b>Value</b>        | <b>2</b> |

- Guadarrama NP

Data to evaluate this indicator could not be retrieved

#### 6.6. Pasture encroachment by woody vegetation (specific indicator for Ordesa NP)

No changes in Corine Land Cover sub-classes 231 or 321 between 2006 and 2012 were detected.

#### References:

- Copernicus Land Monitoring Services. 2016<sub>a</sub>. *Pan-European. Corine Land Cover. CLC 2006. 18.5 version*. Available online from: <http://land.copernicus.eu/pan-european/corine-land-cover/clc-2006/view> (Accessed 31/10/2016)
- Copernicus Land Monitoring Services. 2016<sub>b</sub>. *Pan-European. Corine Land Cover. CLC 2012. 18.5 version*. Available online from: <http://land.copernicus.eu/pan-european/corine-land-cover/clc-2012/view> (Accessed 17/10/2016).
